# Supplementary material for: Dexamethasone Inhibits Spheroid Formation of Thyroid Cancer Cells Exposed to Simulated Microgravity
Source: PubMed Central journal article supplement (PMC7072698; doi:10.3390/cells9020367), 2020-02-05
Supplement: cells-09-00367-s001.pdf [file cells-09-00367-s001.pdf]

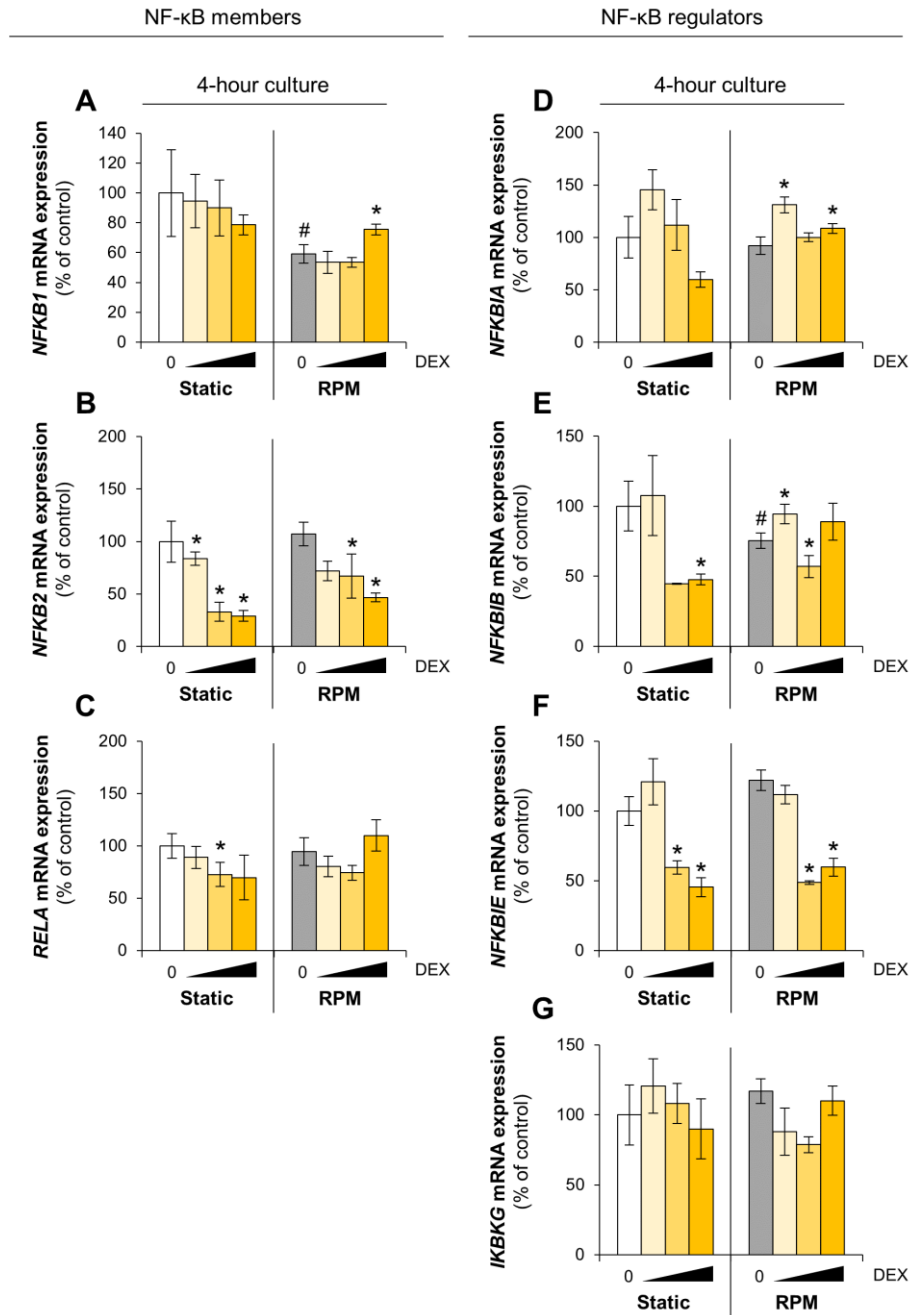

**Figure S1.** Effect of 4 h DEX treatment on NF- $\kappa$ B family members and regulators in FTC-133 cells. (**A**) *NFKB1* mRNA expression; (**B**) *NFKB2* mRNA expression; (**C**) *RELA* mRNA expression. (**D**) *NFKBIA* mRNA expression; (**E**) *NFKBIB* mRNA expression; (**F**) *NFKBIE* mRNA expression; (**G**) *IKBKG* mRNA expression. Depicted are means of relative mRNA levels  $\pm$  standard deviations ( $n = 5$ ). \*:  $p < 0.05$  vs. DEX-free samples. #:  $p < 0.05$  vs. static cultures. AD: adherently growing cells; MCS: multicellular spheroids.

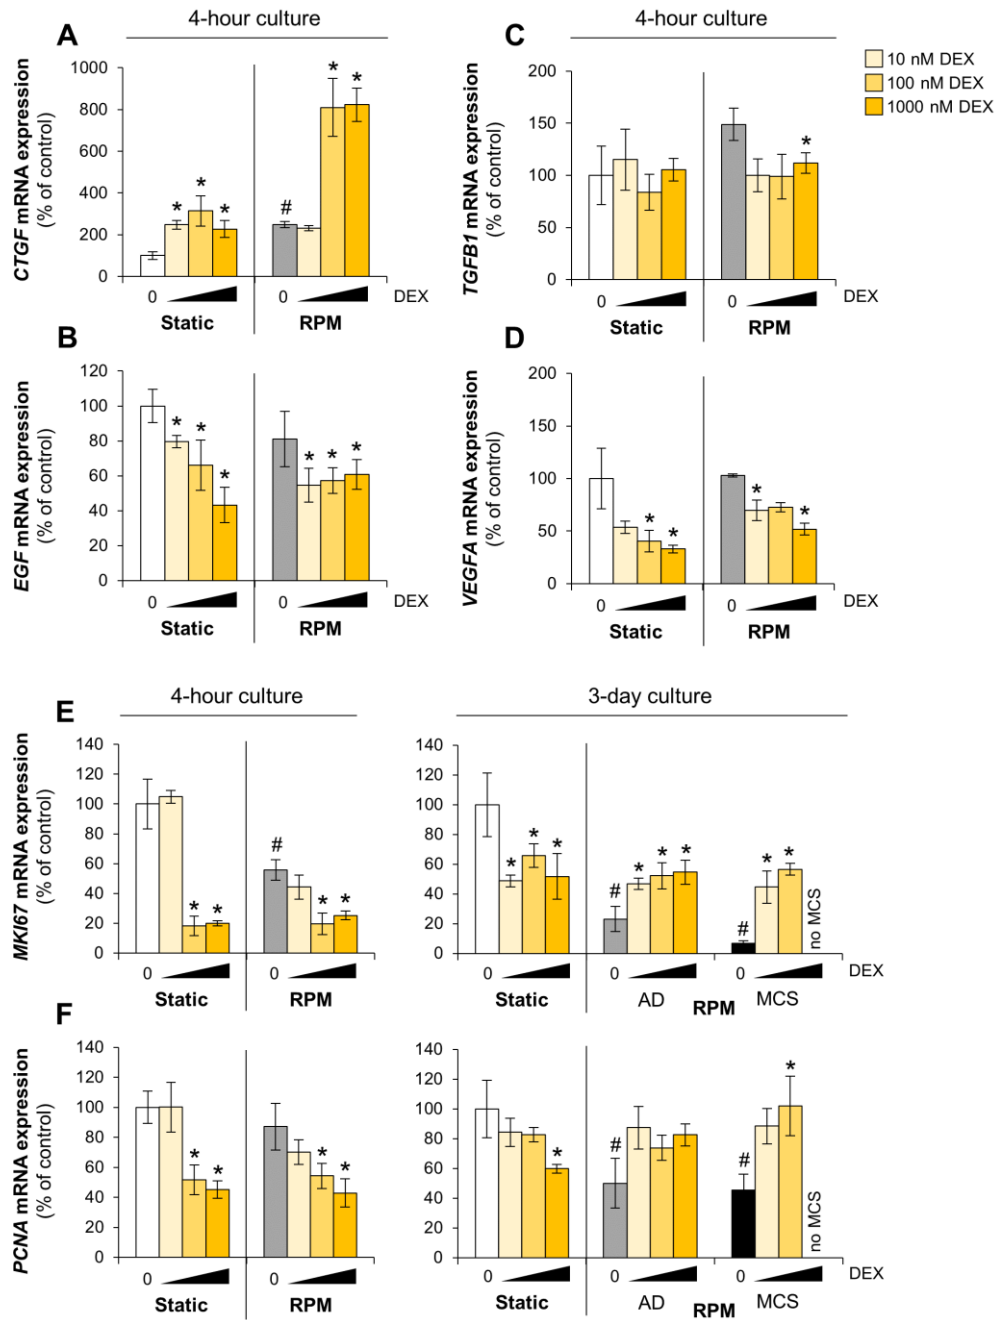

**Figure S2.** Effect of 4 h DEX treatment on growth factors and proliferation markers in FTC-133 cells. (A) *CTGF* mRNA expression; (B) *EGF* mRNA expression; (C) *TGFβ1* mRNA expression; (D) *VEGFA* mRNA expression. (E) *MKI67* mRNA expression; (F) *PCNA* mRNA expression. Depicted are means of relative mRNA levels ± standard deviations ( $n = 5$ ). \*:  $p < 0.05$  vs. DEX-free samples. #:  $p < 0.05$  vs. static cultures. AD: adherently growing cells; MCS: multicellular spheroids.

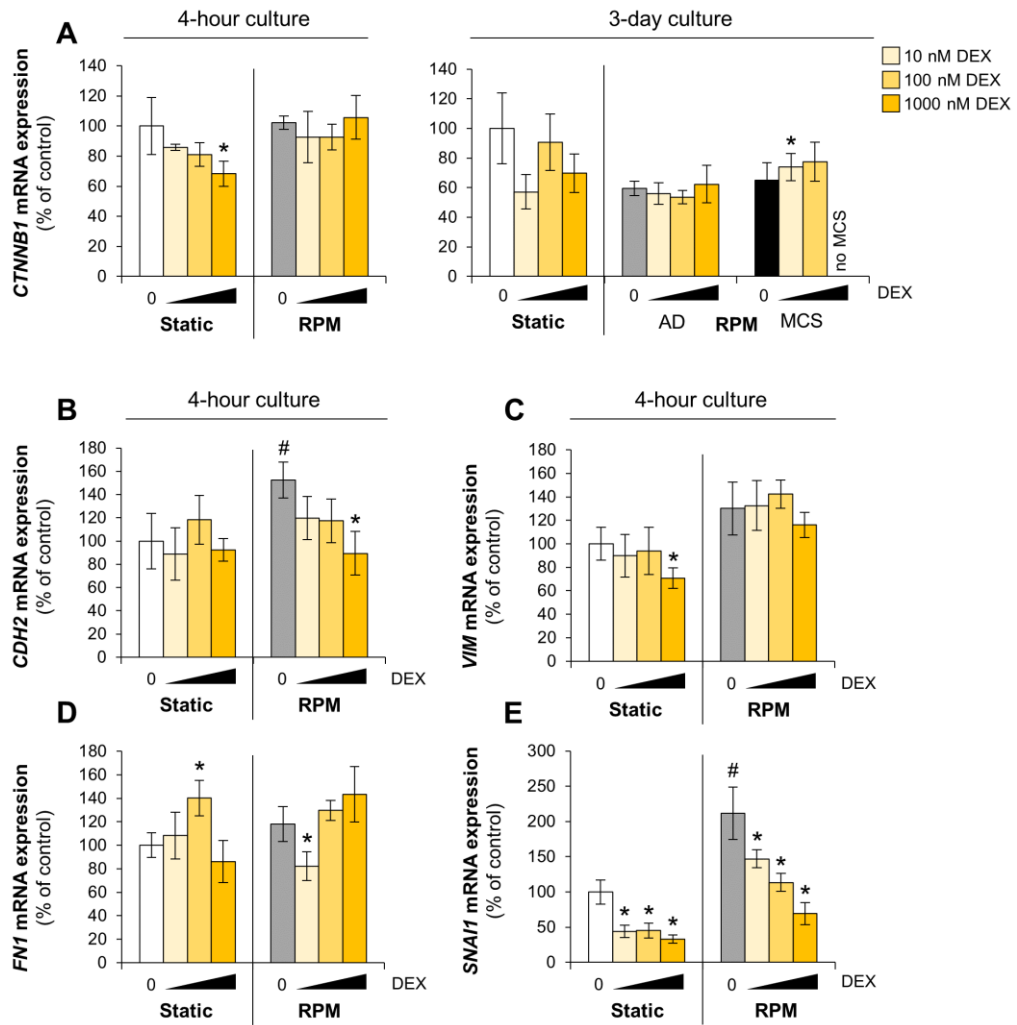

**Figure S3.** Effect of 4 h DEX treatment on growth factors and proliferation markers in FTC-133 cells. (A) *CTGF* mRNA expression; (B) *EGF* mRNA expression; (C) *TGFB1* mRNA expression; (D) *VEGFA* mRNA expression. (E) *MKI67* mRNA expression; (F) *PCNA* mRNA expression. Depicted are means of relative mRNA levels  $\pm$  standard deviations ( $n = 5$ ). \*:  $p < 0.05$  vs. DEX-free samples. #:  $p < 0.05$  vs. static cultures. AD: adherently growing cells; MCS: multicellular spheroids.

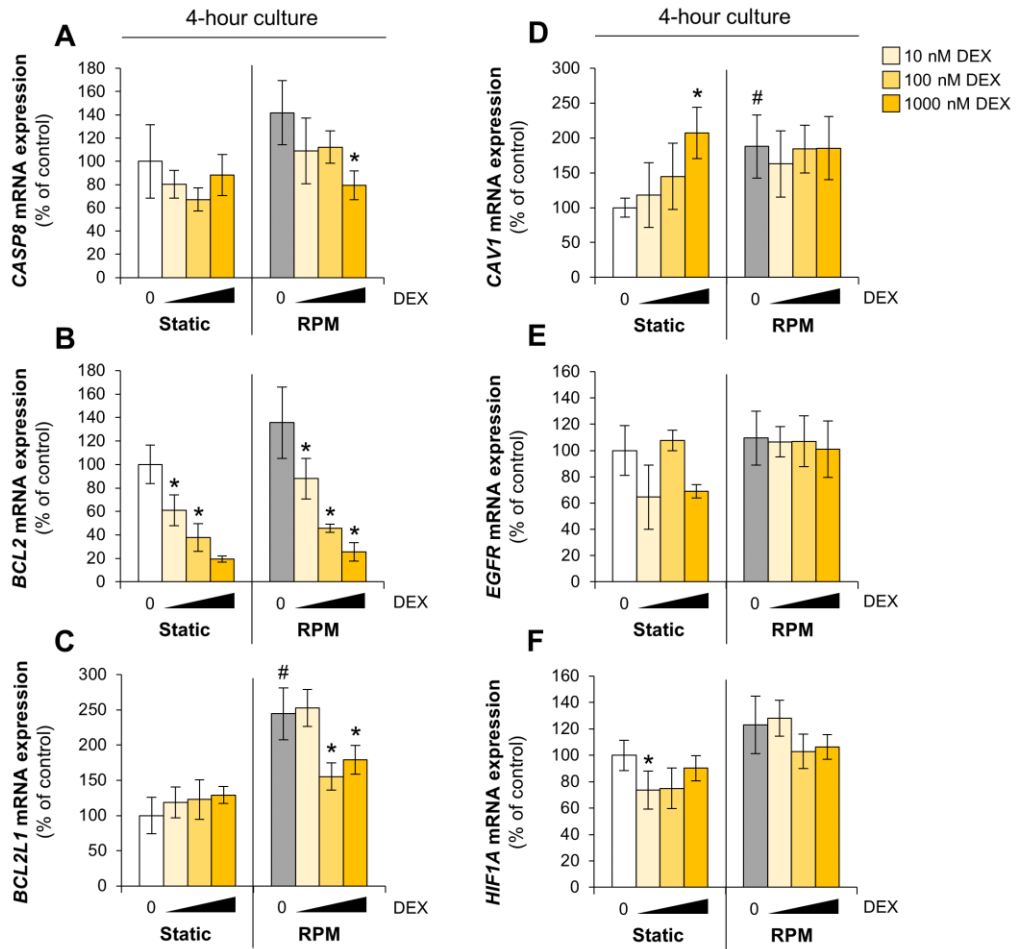

**Figure S4.** Effect of 4 h DEX treatment on anoikis-related factors in FTC-133 cells. (A) *CASP8* mRNA expression; (B) *BCL2* mRNA expression; (C) *BCL2L1* mRNA expression; (D) *CAV1* mRNA expression. (E) *EGFR* mRNA expression; (E) *HIF1A* mRNA expression. Depicted are means of relative mRNA levels  $\pm$  standard deviations ( $n = 5$ ). \*:  $p < 0.05$  vs. DEX-free samples. #:  $p < 0.05$  vs. static cultures. AD: adherently growing cells; MCS: multicellular spheroids.

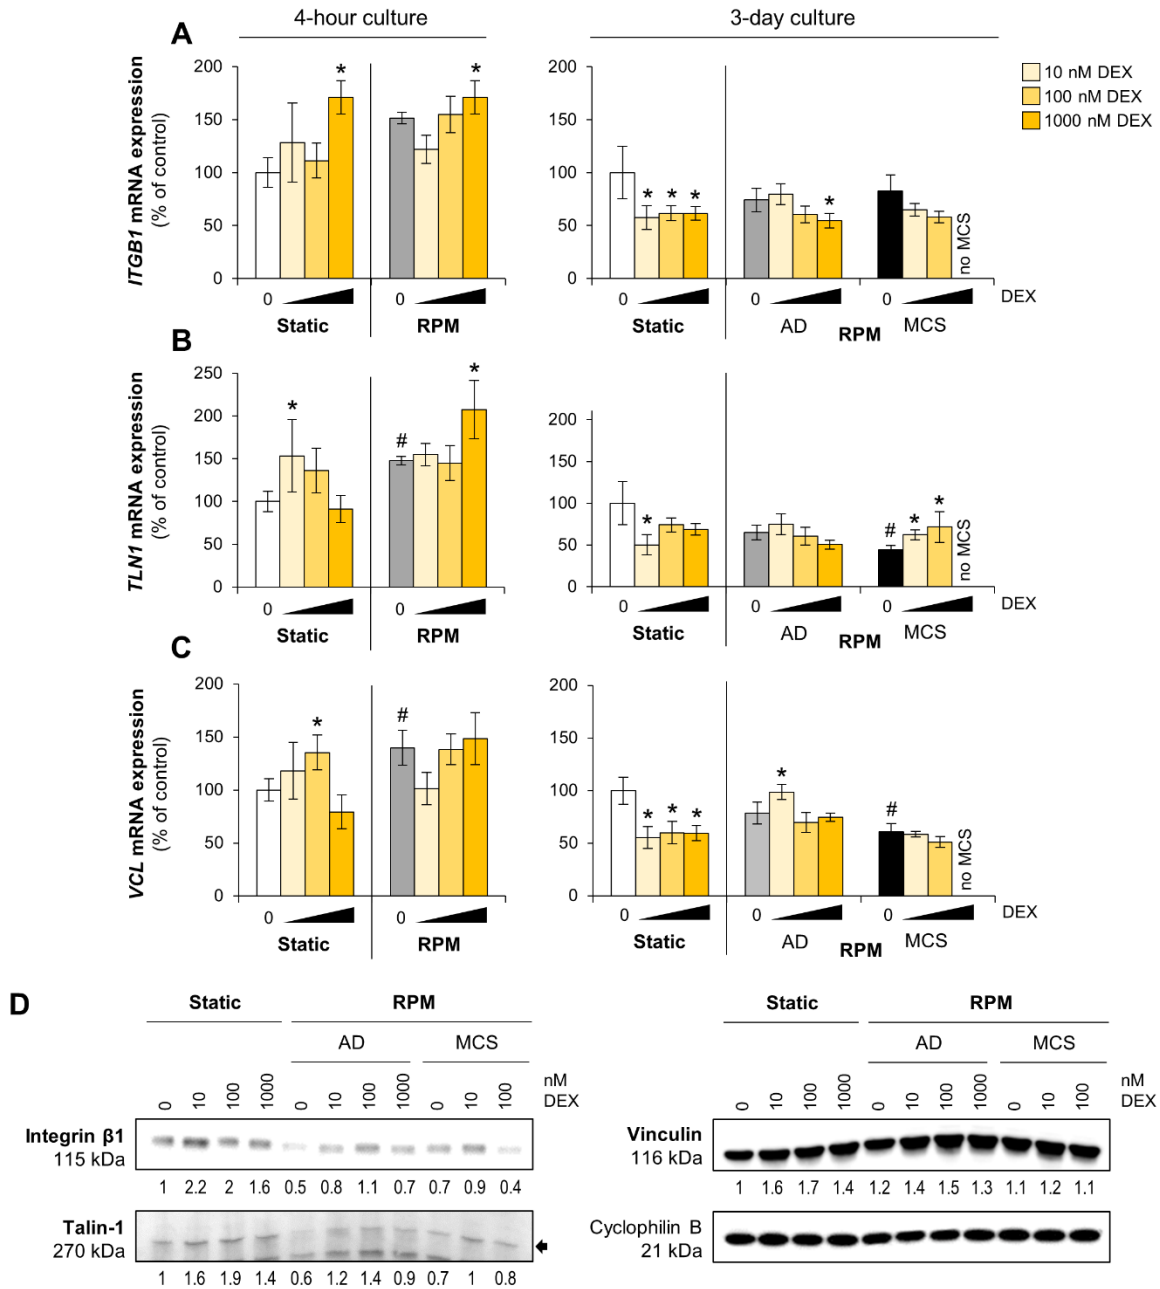

**Figure S5.** Effect of DEX on cell-cell contacts of FTC-133 cells. **(A)** *ITGB1* mRNA expression; **(B)** *TLN1* mRNA expression; **(C)** *VCL* mRNA expression. Depicted are means of relative mRNA levels  $\pm$  standard deviations ( $n = 5$ ). \*:  $p < 0.05$  vs. DEX-free samples. #:  $p < 0.05$  vs. static cultures. **(D)** Western blots indicate protein levels of regulated genes after 3 days. Representatives each of three replicates are shown. Numbers describe relative fold changes to control. AD: adherently growing cells; MCS: multicellular spheroids.

**Table S1.** Primer sequences used in the quantitative real-time PCR.

| <b>Gene</b>     | <b>Primer Name</b> | <b>Sequence (5'→3')</b>     |
|-----------------|--------------------|-----------------------------|
| <i>18S rRNA</i> | 18S-F              | GGAGCCTGCGGCTTAATTT         |
|                 | 18S-R              | CAACTAAGAACGGCCATGCA        |
| <i>BCL2</i>     | BCL2-F             | CCTGTGGATGACTGAGTACCTGAA    |
|                 | BCL2-R             | TCAGAGACAGCCAGGAGAAATCA     |
| <i>BCL2L1</i>   | BCL2L1-F           | CATGGCAGCAGTAAAGCAAG        |
|                 | BCL2L1-R           | TAGAGTTCCACAAAAGTATC        |
| <i>CASP8</i>    | CASP8-F            | TGCAAAAGCACGGGAGAAAG        |
|                 | CASP8-R            | CTCTTCAAAGGTCGTGGTCAAAG     |
| <i>CAV1</i>     | CAV1-EX1-F         | CCTCCTCACAGTTTTTCATCCA      |
|                 | CAV1-EX1-R         | TGTAGATGTTGCCCTGTTCC        |
| <i>CDH1</i>     | CDH1-F             | GCTGGACCGAGAGAGTTTCC        |
|                 | CDH1-R             | CAGCTGTTGCTGTTGTGCTT        |
| <i>CDH2</i>     | CDH2-F             | GTGCATGAAGGACAGCCTCT        |
|                 | CDH2-R             | CCACCTTAAAATCTGCAGGC        |
| <i>CTGF</i>     | CTGF-F             | ACAAGGGCCTCTTCTGTGACTT      |
|                 | CTGF-R             | GGTACACCGTACCACCGAAGAT      |
| <i>CTNNB1</i>   | CTNNB1-F           | GAAACAGCTCGTTGTACCGC        |
|                 | CTNNB1-R           | ATCCACTGGTGAACCAAGCA        |
| <i>EGF</i>      | EGF-F              | TGCCAGCTGCACAAATACAGA       |
|                 | EGF-R              | TCTTACGGAATAGTGGTGGTCATC    |
| <i>EGFR</i>     | EGFR-F             | TTGCCGCAAAGTGTGTAACG        |
|                 | EGFR-R             | GAGATCGCCACTGATGGAGG        |
| <i>FN1</i>      | FN1-F              | AGATCTACCTGTACACCTTGAATGACA |
|                 | FN1-R              | CATGATACCAGCAAGGAATTGG      |
| <i>HIF1A</i>    | HIF1A-F            | TGCTTTAACTTTGCTGGCCC        |
|                 | HIF1A-R            | AGTTTCTGTGTCGTTGCTGC        |
| <i>IKBKG</i>    | IKBKG-F            | AACTGGGACTTTCTCGGAGC        |
|                 | IKBKG-R            | GGCAAGGGCTGTCAGCAG          |
| <i>ITGB1</i>    | ITGB1-F            | GAAAACAGCGCATATCTGGA AATT   |
|                 | ITGB1-R            | CAGCCAATCAGTGATCCACAA       |
| <i>MKI67</i>    | KI67-F             | TGGGGAAAGTAGGTGTGAAAGAAG    |
|                 | KI67-R             | CTCCTTAAACGTTCTGATGCTCTTG   |
| <i>NFKB1</i>    | NFKB1-F            | CTTAGGAGGGAGAGCCAC          |
|                 | NFKB1-R            | TGAAACATTTGTTTCAGGCCTTC     |
| <i>NFKB2</i>    | NFKB2-F            | GTACAAAGATACGCGGACCC        |
|                 | NFKB2-R            | CCAGACCTGGGTTGTAGCA         |
| <i>NFKBIA</i>   | NFκBIA-F           | AATGCTCAGGAGCCCTGTAAT       |
|                 | NFκBIA-R           | CTGTTGACATCAGCCCCACA        |
| <i>NFKBIB</i>   | NFKBIB-F           | CCCGGAGGACCTGGGTT           |
|                 | NFKBIB-R           | GCAGTGCCGTGTCCCC            |
| <i>NFKBIE</i>   | NFκBIE-F           | TGGGCATCTCATCCACTCTG        |
|                 | NFκBIE-R           | ACAAGGGATTCTCAGTCAGGT       |
| <i>PCNA</i>     | PCNA-F             | ACTAAAATGCGCCGGCAAT         |
|                 | PCNA-R             | AACTTTCTCCTGGTTTGGTGCTT     |
| <i>RELA</i>     | NFκB-F             | CGCTTCTTCACACACTGGATTC      |
|                 | NFκB-R             | ACTGCCGGGATGGCTTCT          |
| <i>SNAIL1</i>   | Snail1-F           | CCAGTGCCTCGACCACTATG        |
|                 | Snail1-R           | CTGCTGGAAGGTAAACTCTGGA      |

|              |         |                               |
|--------------|---------|-------------------------------|
| <i>TGFB1</i> | TGFB1-F | CACCCGCGTGCTAATGGT            |
|              | TGFB1-R | AGAGCAACACGGGTTTCAGGTA        |
| <i>TLN1</i>  | TLN1-F  | GATGGCTATTACTCAGTACAGACAACTGA |
|              | TLN1-R  | CATAGTAGACTCCTCATCTCCTTCCA    |
| <i>VCL</i>   | VCL-F   | GTCTCGGCTGCTCGTATCTT          |
|              | VCL-R   | GTCCACCAGCCCTGTCATTT          |
| <i>VEGFA</i> | VEGFA-F | GCGCTGATAGACATCCATGAAC        |
|              | VEGFA-R | CTACCTCCACCATGCCAAGTG         |
| <i>VIM</i>   | VIM-F   | TTCAGAGAGAGGAAGCCGAAAAC       |
|              | VIM-R   | AGATTCCACTTTGCGTTCAAGGT       |

**Table S2.** Antibodies used for Western blot analyses.

| <b>Antibodies</b>     | <b>Company, Product Nr.</b> | <b>Species<sup>1</sup></b> | <b>MW (kDa)</b> | <b>Dilution</b> |
|-----------------------|-----------------------------|----------------------------|-----------------|-----------------|
| Caspase 3             | CST, #9662S                 | Rb                         | 35              | 1:800           |
| - cleaved             | CST, #9664S                 | Rb                         | 17              | 1:500           |
| $\beta$ -catenin      | Invitrogen, #MA1-300        | Ms                         | 94              | 1:500           |
| Cyclophilin B         | Abcam, #ab178397            | Rb                         | 18              | 1:1000          |
| E-cadherin            | Abcam, #ab1416              | Ms                         | 110             | 1:1000          |
| Fibronectin           | Invitrogen, #MA5-11981      | Rb                         | 263             | 1:2000          |
| I $\kappa$ B $\alpha$ | CST, #9242S                 | Rb                         | 39              | 1:1000          |
| Integrin $\beta$ 1    | CST, #4706S                 | Ms                         | 115             | 1:1000          |
| NF- $\kappa$ B p52    | Invitrogen, #MA5-15110      | Rb                         | 52, 100         | 1:1000          |
| NF- $\kappa$ B p65    | Sigma, #SAB4502615          | Rb                         | 65              | 1:1000          |
| Talin                 | CST, #4021T                 | Rb                         | 270             | 1:1000          |
| Vinculin              | Sigma, #V9131               | Ms                         | 116             | 1:500           |

<sup>1</sup> Ms: mouse; Rb: rabbit.
